# Supplementary material for: Observationally constrained analysis of sulfur cycle in the marine atmosphere with NASA ATom measurements and AeroCom model simulations
Source: Copernicus journal article supplement (doi:10.5194/egusphere-2023-1966), 2023-09-12
Supplement: Supplementary file 1 [file egusphere-2023-1966-supplement.pdf]

# 1 Observationally constrained analysis of sulfur cycle in the marine atmosphere with NASA 2 ATom measurements and AeroCom model simulations

3  
4 Huisheng Bian<sup>1,2</sup>, Mian Chin<sup>2</sup>, Peter Colarco<sup>2</sup>, Eric C. Apel<sup>3</sup>, Donald R. Blake<sup>4</sup>, Karl Froyd<sup>5</sup>, Rebecca S.  
5 Hornbrook<sup>3</sup>, Jose Jimenez<sup>6,5</sup>, Pedro Campuzano Jost<sup>6,5</sup>, Michael Lawler<sup>5,7</sup>, Mingxu Liu<sup>8</sup>, Marianne Tronstad Lund<sup>9</sup>,  
6 Hitoshi Matsui<sup>8</sup>, Benjamin A. Nault<sup>6,5,10,11</sup>, Joyce E. Penner<sup>12</sup>, Andrew W. Rollins<sup>5,13</sup>, Gregory Schill<sup>7</sup>, Ragnhild B.  
7 Skeie<sup>9</sup>, Hailong Wang<sup>14</sup>, Lu Xu<sup>15,16</sup>, Kai Zhang<sup>14</sup>, and Jialei Zhu<sup>17</sup>

8  
9 <sup>1</sup>Goddard Earth Sciences Technology and Research (GESTAR) II, University of Maryland at Baltimore County,  
10 Baltimore, MD, USA.

11 <sup>2</sup>NASA Goddard Space Flight Center, Greenbelt, MD, USA.

12 <sup>3</sup>Atmospheric Chemistry Observations & Modeling Laboratory, National Center for Atmospheric Research, Boulder,  
13 CO, USA,

14 <sup>4</sup>Department of Chemistry, University of California Irvine, CA, USA.

15 <sup>5</sup>Cooperative Institute for Research in Environmental Sciences, University of Colorado, Boulder, CO, USA.

16 <sup>6</sup>Department of Chemistry, University of Colorado, Boulder, CO, USA.

17 <sup>7</sup>NOAA Chemical Sciences Laboratory, Boulder, CO, USA.

18 <sup>8</sup>Graduate School of Environmental Studies, Nagoya University, Nagoya, Japan.

19 <sup>9</sup>CICERO Center for International Climate Research, Oslo, Norway.

20 <sup>10</sup>Now at: Department of Environmental Health and Engineering, Whiting School of Engineering, The Johns  
21 Hopkins, Baltimore, MD, USA

22 <sup>11</sup>Now at: Center for Aerosol and Cloud Chemistry, Aerodyne Research, Inc., Billerica, MA, USA

23 <sup>12</sup>Dept. of Atmospheric, Oceanic and Space Sciences, University of Michigan, Ann Arbor, Michigan, USA.

24 <sup>13</sup>NOAA Earth System Research Laboratory, Chemical Sciences Division, Boulder, CO, USA.

25 <sup>14</sup>Atmospheric Sciences and Global Change Division, Pacific Northwest National Laboratory, Richland, WA, USA.

26 <sup>15</sup>Division of Geological and Planetary Sciences, California Institute of Technology, Pasadena, CA, USA.

27 <sup>16</sup>Department of Energy, Environmental and Chemical Engineering, Washington University in St. Louis, Missouri,  
28 USA.

29 <sup>17</sup>Institute of Surface-Earth System Science, School of Earth System Science, Tianjin University, Tianjin, China.

30  
31 *Correspondence to:* Huisheng Bian ([huisheng.bian@nasa.gov](mailto:huisheng.bian@nasa.gov))

## 32 33 **Supplementary Material**

34  
35 We further analyze observations and simulations, similar to Figs 2–4, but include all  
36 measurements of SO<sub>4</sub>, SO<sub>2</sub>, and DMS in Figs S1–3, respectively. Specifically, the negative  
37 values measured by AMS, CIMS, and LIF and the LDL value "-888" measured by TOGA and  
38 WAS were included, and the value "-888" was replaced with "0". Of course, the observed median  
39 and mean values dropped substantially, by 17% and 13% for SO<sub>4</sub>, and by 34% and 34% for SO<sub>2</sub>.  
40 DMS is unique in that most of its measurements are reported as "-888", which results in a  
41 median of zero in Fig. S3 and a 86% drop in the mean. However, the model statistics vary  
42 relatively small, 4% and 13% for SO<sub>4</sub> and 12% and 15% for SO<sub>2</sub>. The median modeled DMS  
43 decreased from 56.6 pptv to 0.7 pptv and a mean decrease of 76%.

44  
45 The observed and simulated vertical profiles in each ATom are further shown in Figs. S4-7 to  
46 reveal details of seasonal changes. For example, the SO<sub>2</sub> values measured by LIF in Fig. 6 are  
47 lower than the average SO<sub>2</sub> values measured by CIMS, but the two SO<sub>2</sub> profiles shown in Fig. S5  
48 in ATom-4 are in good agreement when the LIF was onboard. This means that the SO<sub>2</sub> measured  
49 by CIMS during ATom-1 to -3 is higher than the SO<sub>2</sub> measured during ATom-4. A discussion of  
50 some seasonal characteristics has been given in main text Sect. 3.2.

52 Overall model performance has been demonstrated in Figs 9-11. The performance of each model  
53 on a regional and seasonal basis is further provided in Figs S8-10 to help modelers identify  
54 strengths and weaknesses of the model's sulfur simulations. Also, the mean values shown in the  
55 figures add information about extreme pollution.

56  
57 As we mentioned in the main text, pollution levels in the model world and the observed world  
58 can differ substantially in certain regions of each ATom, and this difference can be caused by the  
59 majority of models or a few individual models. Each model performs better or worse than the  
60 others at every time and place. For example, in summer and winter, the CAM-ATRAS model  
61 gave the highest estimates of atmospheric SO<sub>4</sub> in the oceanic boundary layer (BL), but the  
62 IMPACT and OsloCTM3 models gave the highest estimates of atmospheric SO<sub>4</sub> in the free  
63 troposphere (Fig. S8). All models except the GEOS model generally overestimate SO<sub>4</sub> in the  
64 atmosphere. On the other hand, the E3SM model gives significantly higher SO<sub>2</sub> compared with  
65 the measurements and other models in BL (Fig. S9). Unlike the case of SO<sub>4</sub>, all models tend to  
66 underestimate SO<sub>2</sub> in the free troposphere, with some exceptions such as the GEOS model in the  
67 North Pacific mid-high-latitude winter (ATom-2) and the CAM-ATRAS and IMPACT models in  
68 the South Atlantic mid-latitude autumn (ATom-4). The overestimation of the DMS multi-model  
69 median in Fig. S10 is clearly attributable to the contribution of all models, with the models  
70 CAM-ATRAS and OsloCTM3 being more prominent.

71  
72 The mean values of SO<sub>4</sub>, SO<sub>2</sub>, and DMS are generally higher than the median values at most  
73 times and locations, and the ratio of mean-to-median value in the BL is even greater than that in  
74 the free troposphere. Sometimes the ratio is very high (e.g., > 10), which means that extreme  
75 contamination has been identified.

76  
77  
78  
79  
80  
81  
82  
83  
84  
85  
86  
87  
88  
89  
90  
91  
92  
93

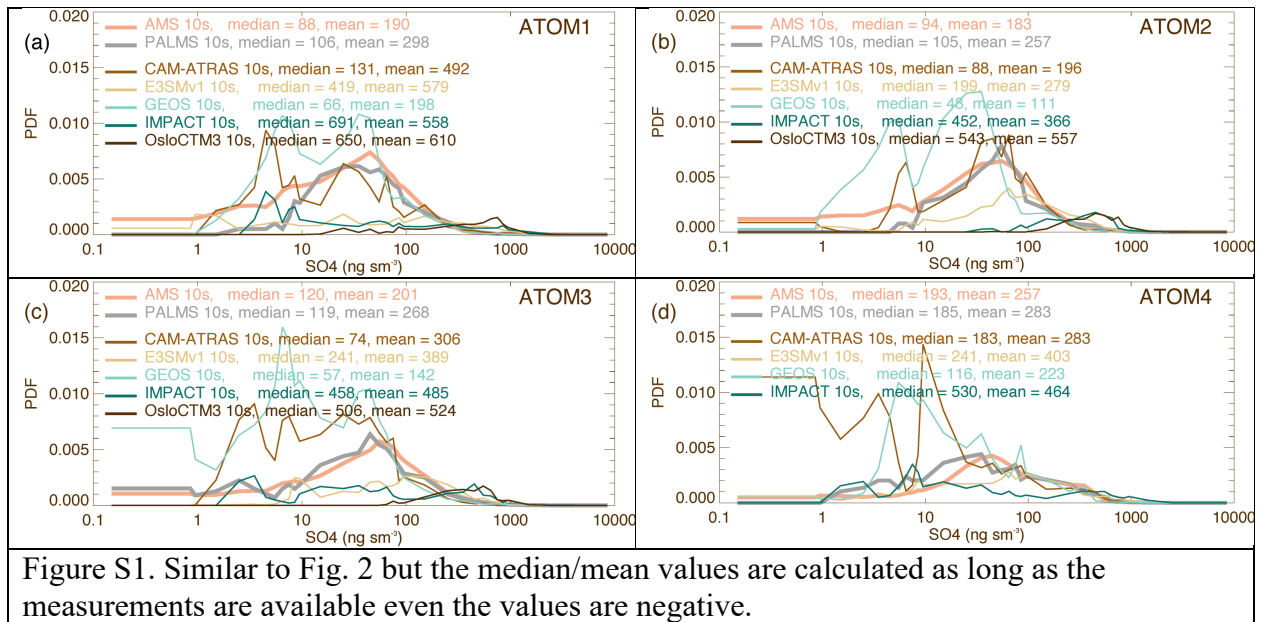

94  
95  
96

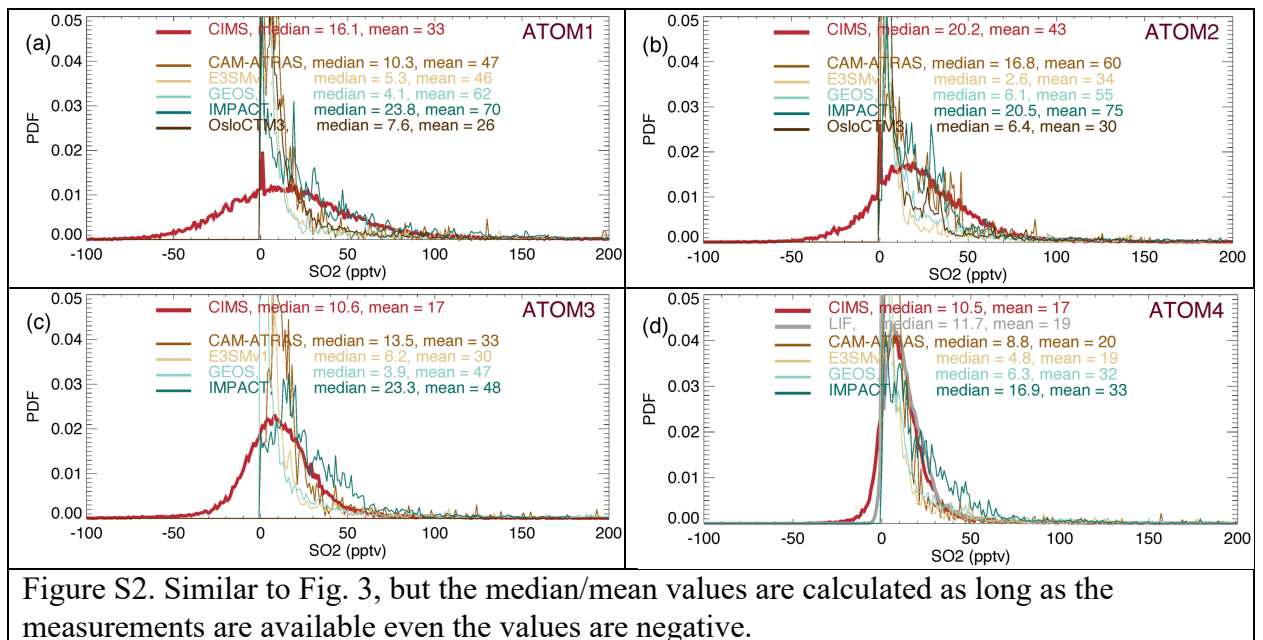

97  
98

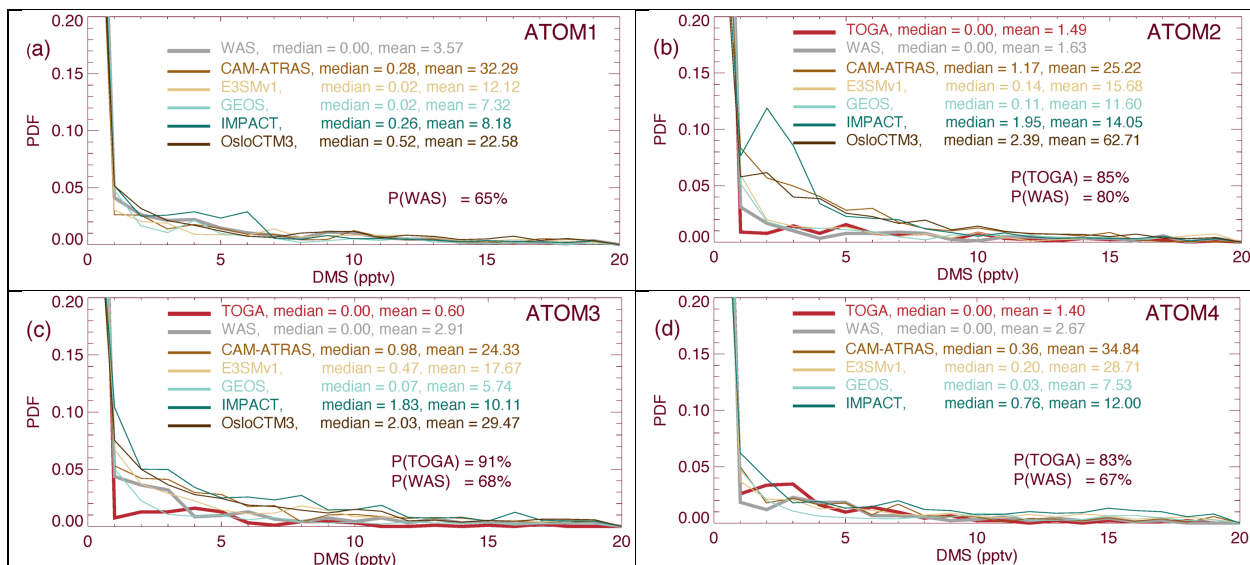

Figure S3. Similar to Fig. 4, but instead of excluding the “-888” measurements, these are replaced with 0 as suggested by the instrument PIs. The percentage (P) of the measured “-888” is given for TOGA and WAS measurement data. Model median/mean values are calculated when measurements including these “-888” are available.

99

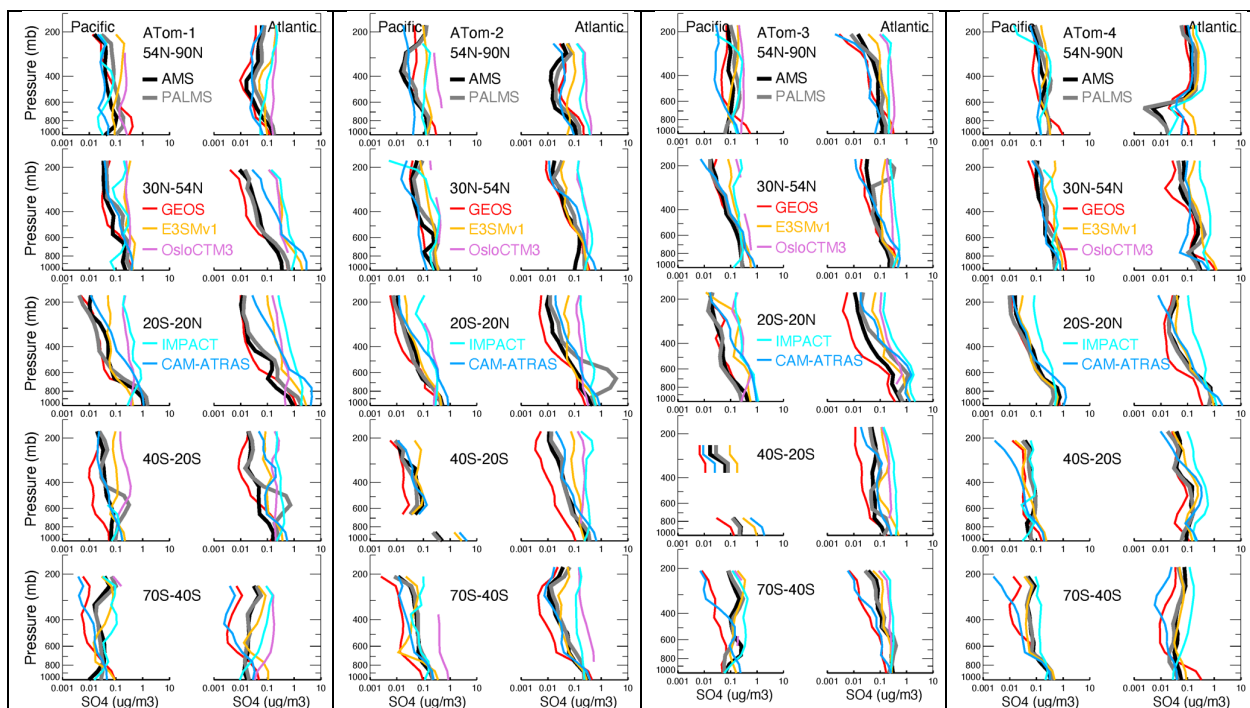

Figure S4. Observed and modeled vertical profiles of SO<sub>4</sub> in 1-km vertical bins for four ATom deployments shown from left to right. ATom measurements are shown in black and grey lines while model results are shown in color lines. Comparisons are conducted only when both observational measurements above detect limitation are available. Comparisons are separated into five latitude bands from the northern to the southern hemisphere, and into Pacific and Atlantic Basins.

100

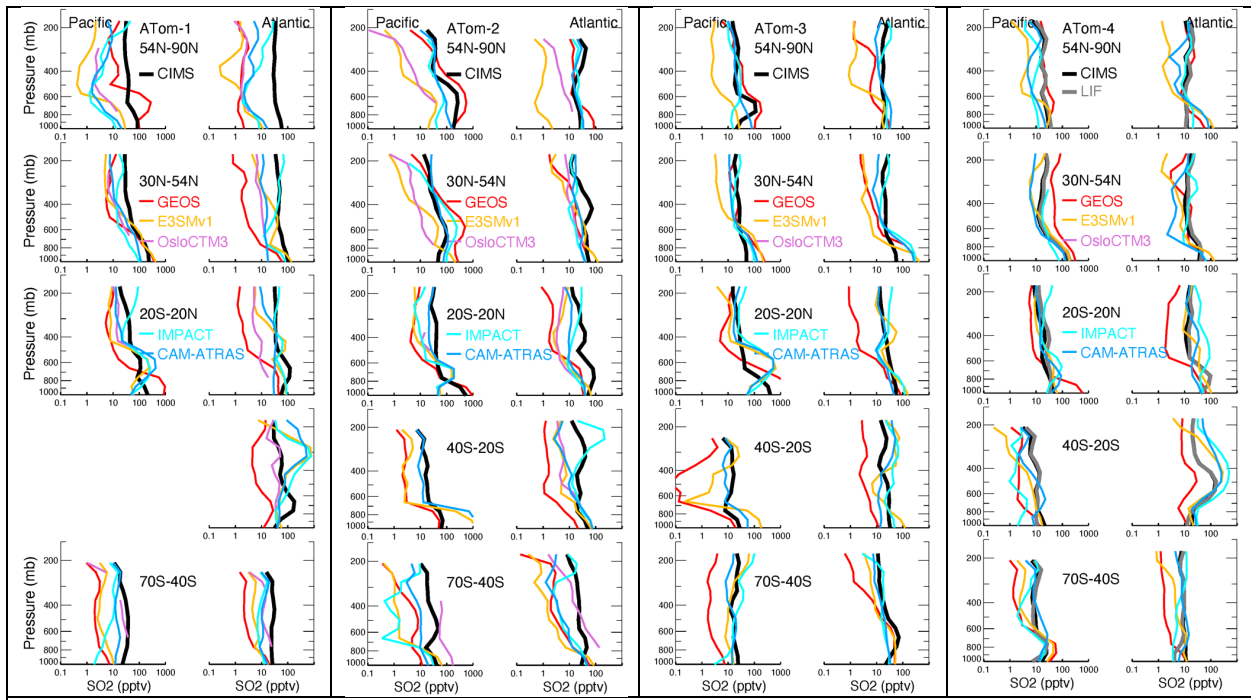

Figure S5. Similar to Fig. S4 but for SO<sub>2</sub>.

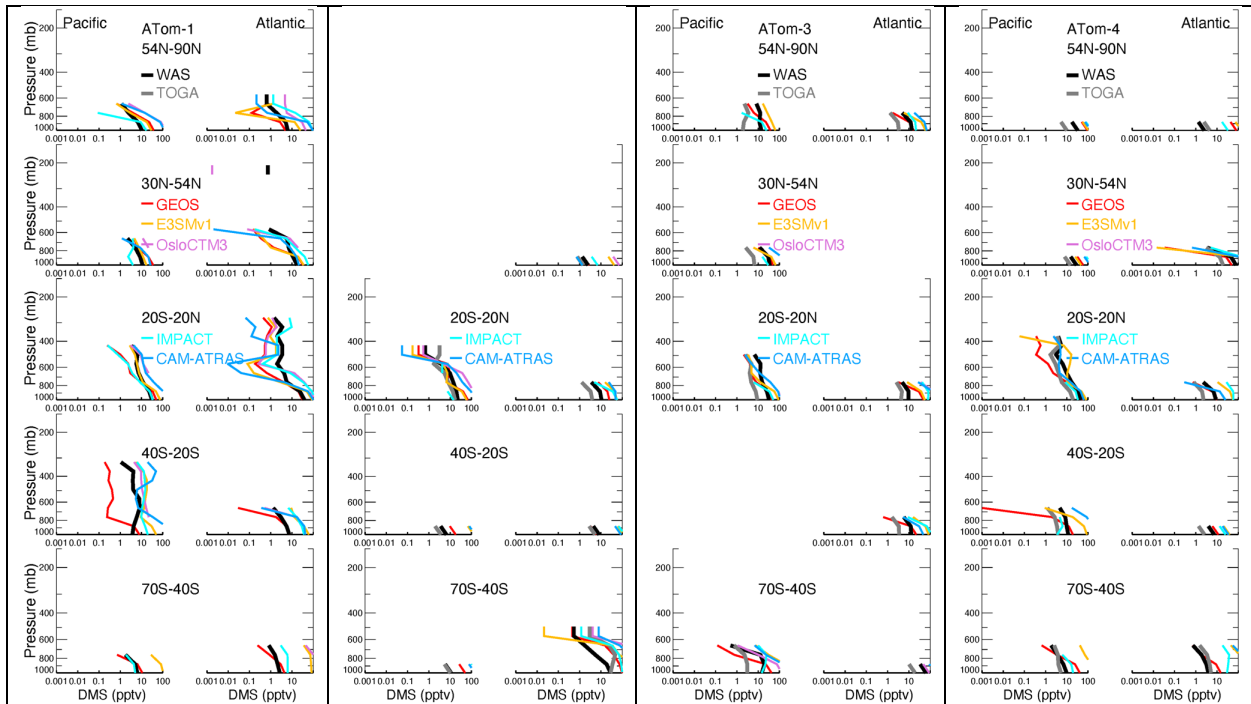

Figure S6. Similar to Fig. S4 but for DMS.

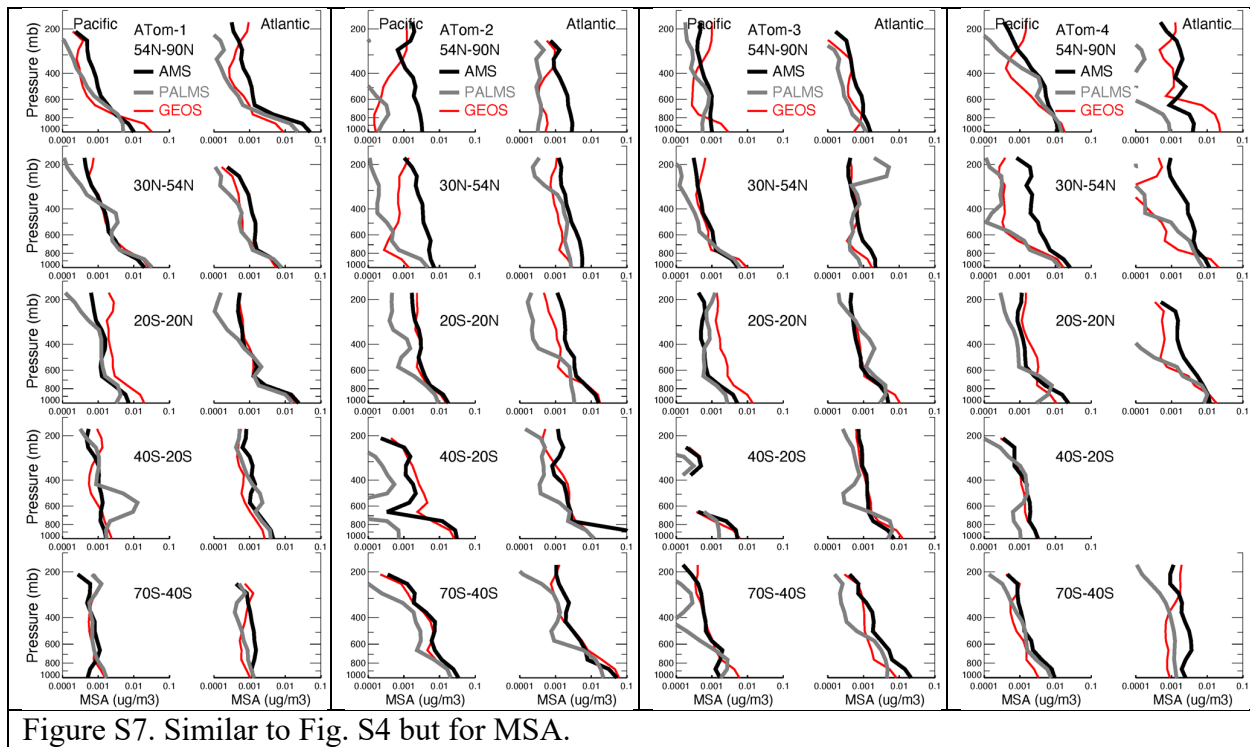

105  
 106  
 107  
 108  
 109  
 110  
 111  
 112  
 113  
 114  
 115  
 116  
 117  
 118  
 119  
 120  
 121  
 122  
 123  
 124  
 125  
 126  
 127  
 128  
 129

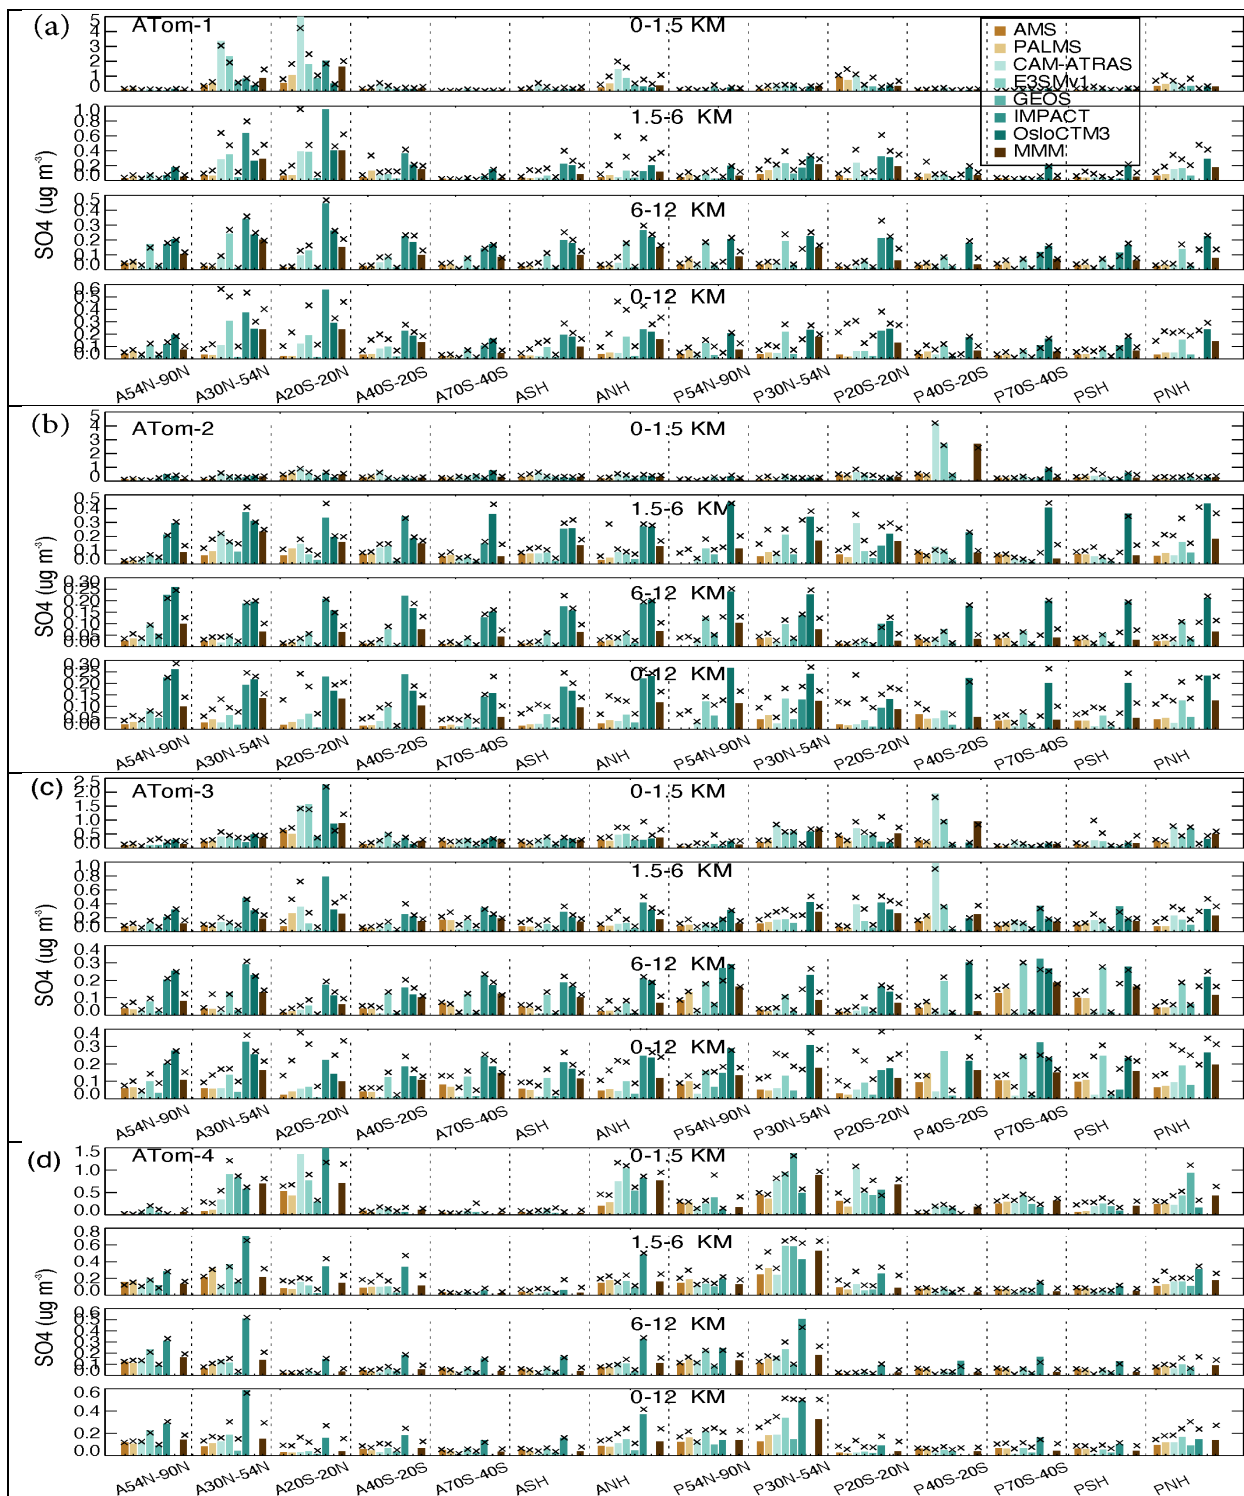

Figure S8. Median (histogram) and mean (symbol x) values of SO<sub>4</sub> from two measurements (red and yellow), five model simulations (other bluish colors), and multi-model simulation (black) analyzed over five latitudinal bands and SH and NH over Atlantic and Pacific oceans in four vertical layers (i.e., 0-1.5 km, 1.5-6 km, 6-12km, and 0-12 km) for four ATom deployments (a-d).

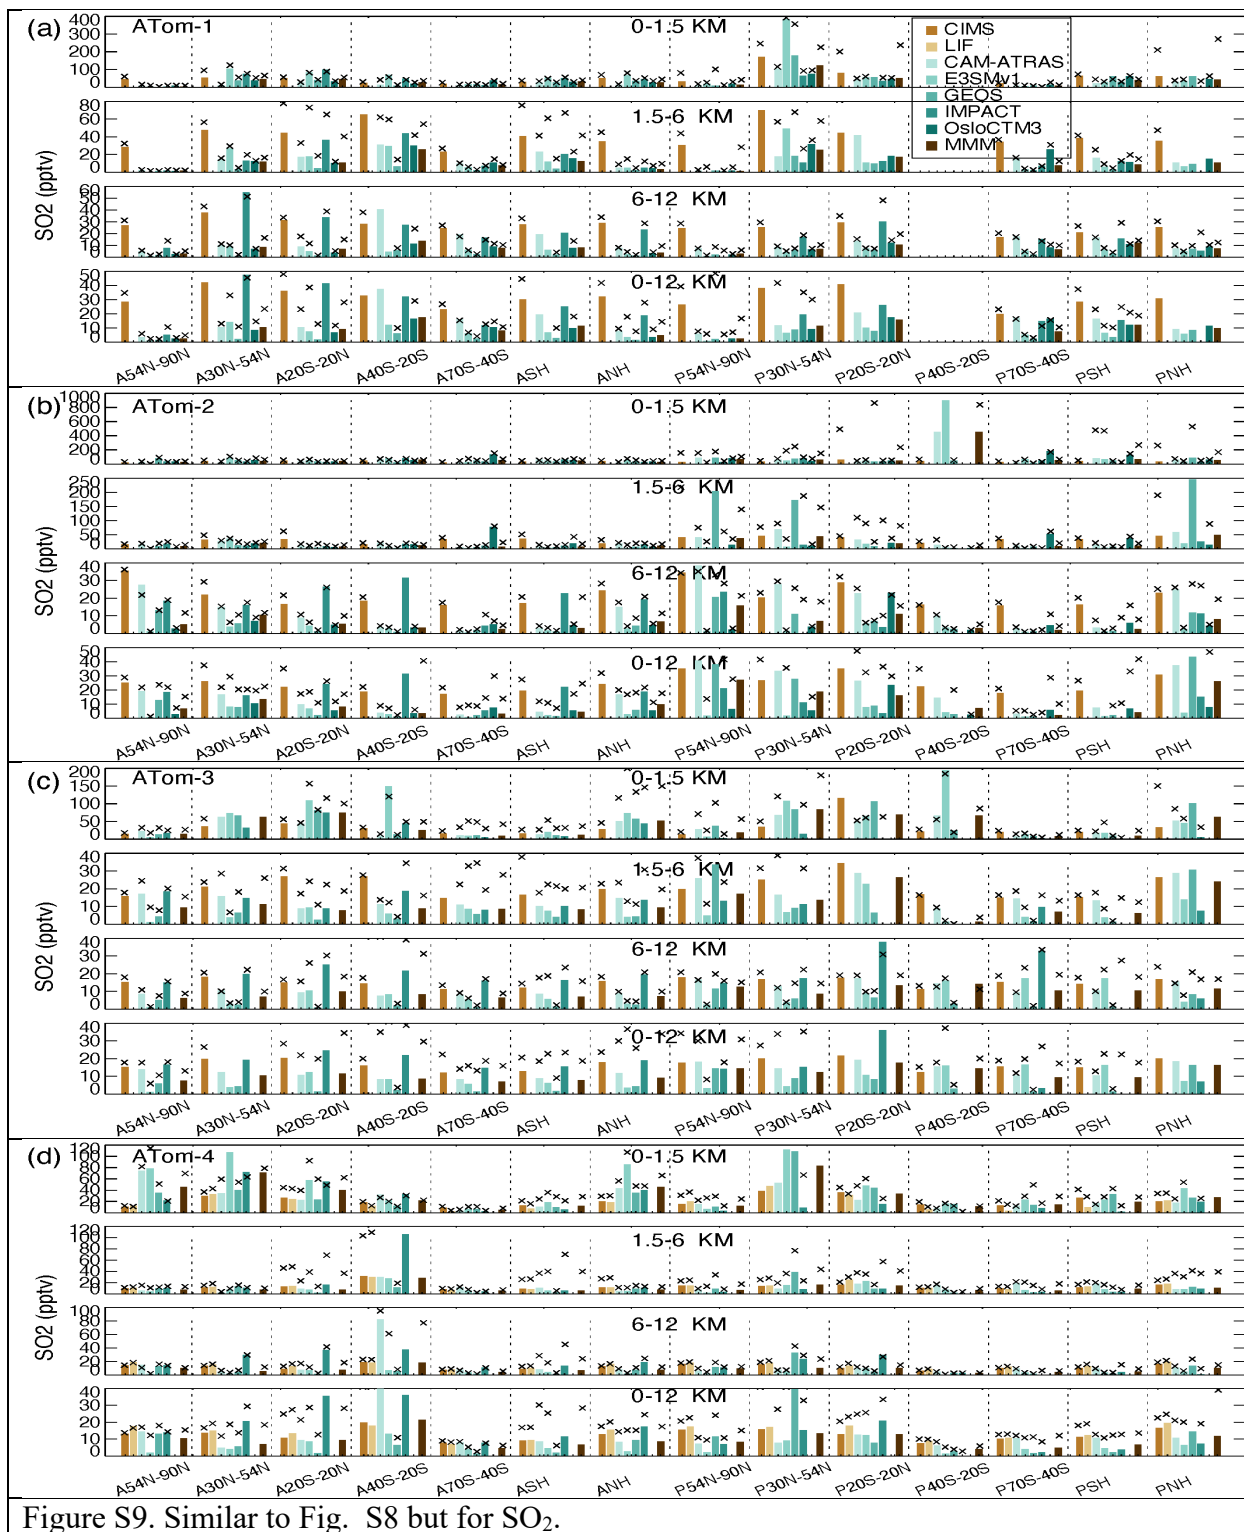



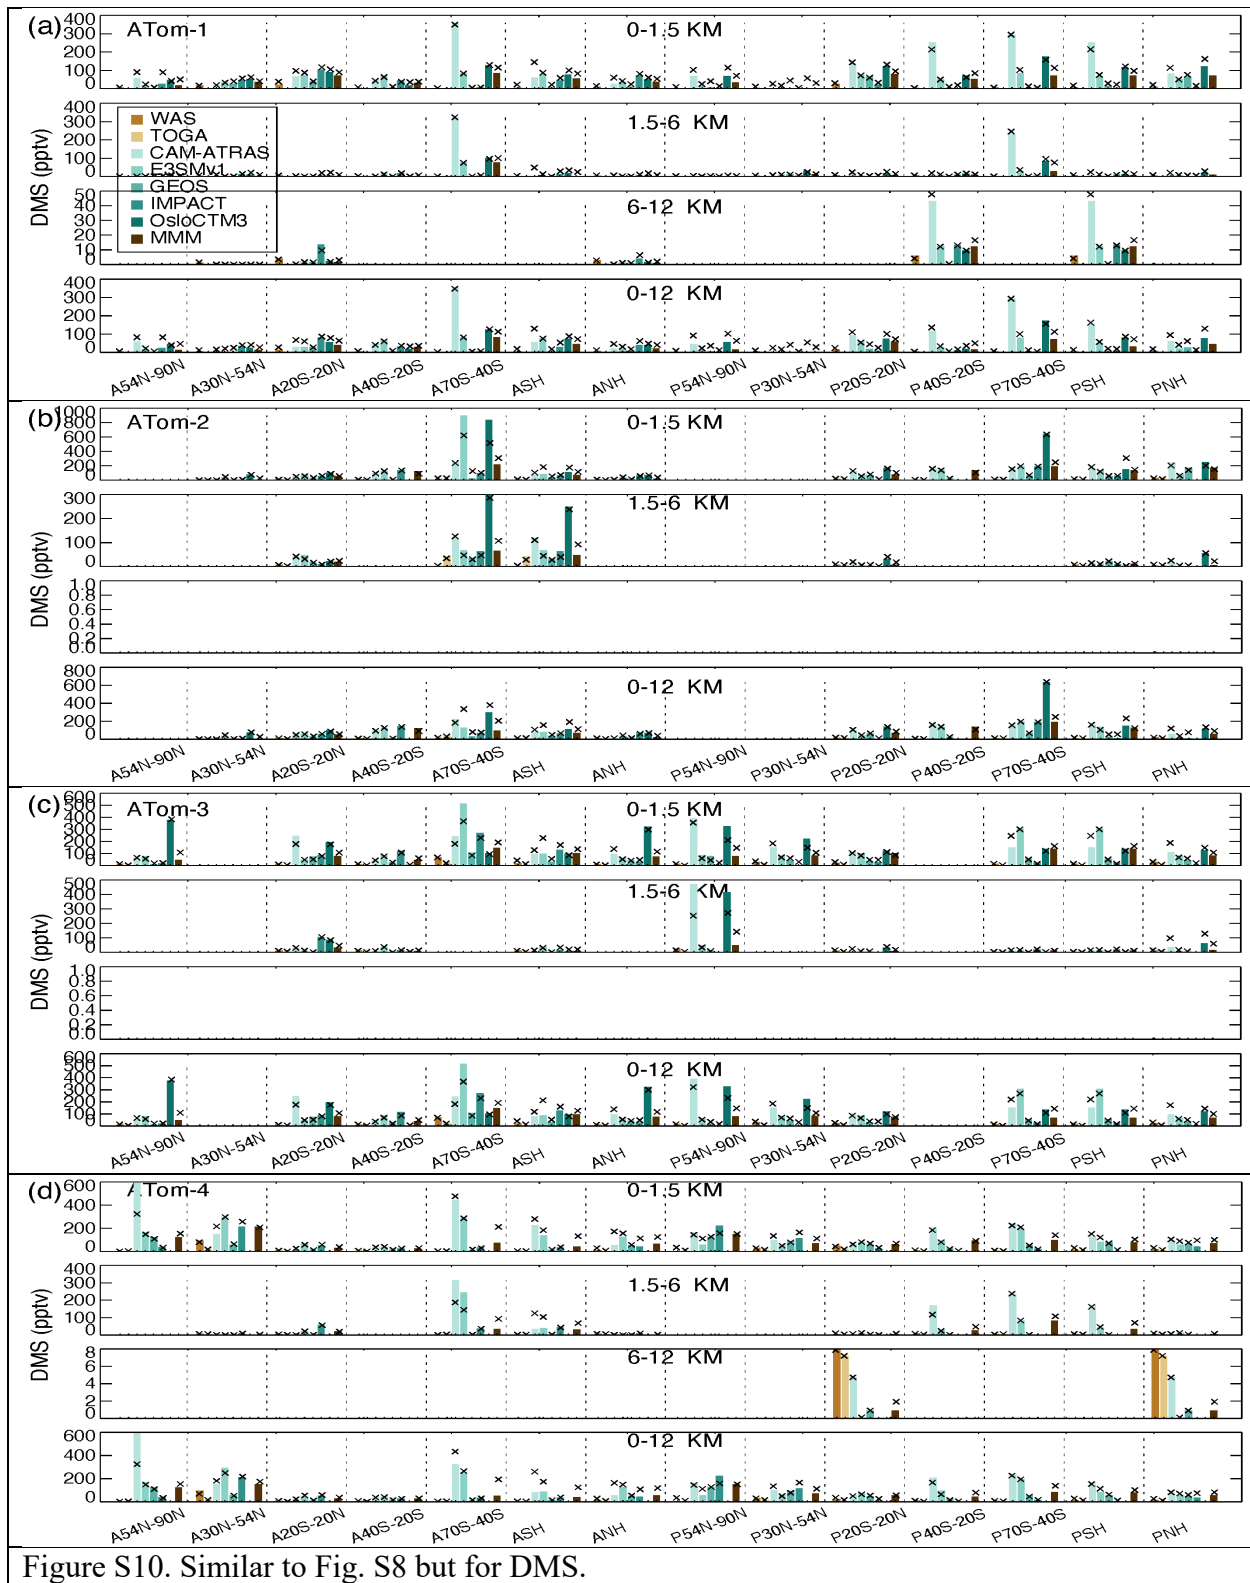

Figure S10. Similar to Fig. S8 but for DMS.

132  
133  
134
