# Supplementary material for: Observationally constrained analysis of sulfur cycle in the marine atmosphere with NASA ATom measurements and AeroCom model simulations
Source: Copernicus journal article supplement (doi:10.5194/egusphere-2023-1966), 2023-09-12
Supplement: Supplementary file [file egusphere-2023-1966-AC1-supplement.pdf]

1 We thank the reviewers for their good summary and comments. Below is our point-to-point response.  
 2 We use PxxLxx, Fig. xx, and Table xx for revised version and OPxxLxx, OLxx, OFig.xx, OTable xx for the  
 3 original submission. Please check PxxLxx in the revised file, whose name is tagged "track".  
 4

5 **Review 1 (R1):**

6 **1. Relevance and novelty of this study:**

7 R1#1. It would be helpful if the authors could state the reasons for focusing on sulfur species in a more  
 8 straightforward way in the introduction section. While the introduction highlights the environmental  
 9 impacts of sulfur species, other pollutants not discussed in this paper also affect the environment. Why  
 10 should we focus on sulfur species? Is the bias of aerosol climate models predominantly due to sulfur?  
 11 As we mentioned in P2L74-89, the sulfur cycle plays a key role in atmospheric quality, climate,  
 12 and ecosystems. This importance is primarily due to the fact that the atmospheric sulfate  
 13 component itself contributes to radiation forcing (RF) almost as much as all other major non-  
 14 natural aerosol components, as concluded from 16 AeroCom model results (Myhre et al., 2013).  
 15 More importantly, uncertainty in sulfate simulations in current climate models is a major  
 16 contributor to biases in aerosol optical depth (AOD, Fig. 3 in Gliß et al., 2021) and radiative  
 17 forcing (RF, Fig. 7 in Myhre et al., 2013). Above discussion has been added in P2L89-94.  
 18

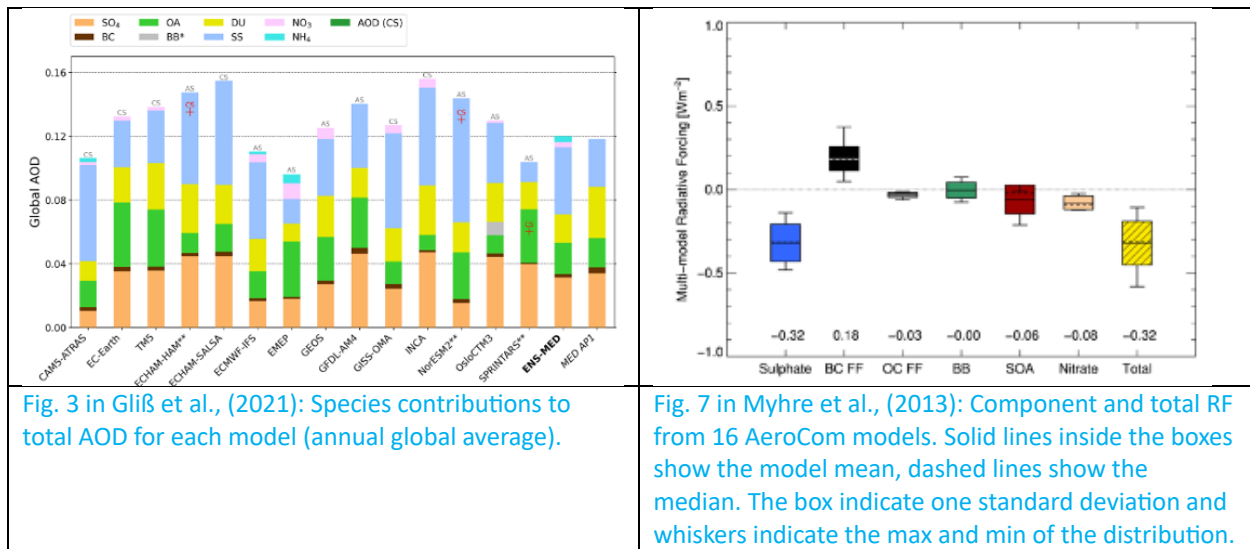

19  
 20 R1#2. I would appreciate it if the authors could highlight the novelty of their work. Has any other  
 21 research analyzed the ATOM data specifically for sulfur species?  
 22 To date, there is one publication that extends the simplified DMS oxidation scheme used in  
 23 Community Atmospheric Model Chemistry version 6 (CAM6-chem) using ATom data (Fung et al.,  
 24 2022). However, a comparison of SO<sub>2</sub>, a key sulfur species in the sulfur cycle, between CAM6-  
 25 chem and ATom has not been reported. We have summarized previous studies of aerosols  
 26 (including sulfur species) related to ATom in P3L134-145.  
 27  
 28 R1#3. Is this the first study that utilizes ATOM measurements in comparison with AeroCom models?  
 29 Our work is the first study to use ATom measurements for comparison with the AeroCom  
 30 models, focusing on all sulfur species simulated in current aerosol climate models. This work

31 extends previous efforts that utilize ATom measurements to evaluate the organic carbon (Hodzic  
32 et al., 2020) and black carbon (Katich et al., 2018) of AeroCom models. See P3L134-137.

33

34 R1#4. If there have been studies on sulfur variability and sources over the ocean, what novel findings  
35 does this paper present?

36 To our knowledge, there are no such publications investigating the variability and sources of all  
37 major sulfur species in the ocean. Our study aims not only to reveal sulfur variability based on  
38 multiple measurements and model simulations, but also to tease out the underlying processes  
39 behind the variability by integrating analyzes of simulated sulfur species in aerosol climate  
40 models. This work therefore provides direction for improvements in aerosol climate models. See  
41 P3L141-145.

42

43 For example, our study found that all AeroCom models overestimate DMS near the sea surface  
44 (Fig. 4). Is this overestimation due to the model DMS vertical gradient being steeper than the  
45 ATom data (Fig. 8) or the DMS emissions being larger than they should be? A unique approach  
46 taken in our study revealed DMS emissions as one of the causes by integrating the analysis of  
47 DMS, SO<sub>2</sub>, and SO<sub>4</sub> in a model-ATom comparison (P11L740-747). By reviewing the DMS  
48 emission methods adopted by the five AeroCom models (Table 3), we further found that the  
49 calculation of the air-sea exchange flux formula plays a key role in determining DMS emissions  
50 (P9L589-648).

51

52 The AeroCom models also tend to underestimate SO<sub>2</sub> and overestimate SO<sub>4</sub> over remote  
53 oceans. This performance prompted modelers to explore potential faster chemical conversion  
54 of SO<sub>2</sub> and different dry and wet removal of SO<sub>2</sub> and SO<sub>4</sub>. One suggestion for modelers is that  
55 using interactive oxidant calculation is insufficient to solve the problem because there is no  
56 systematic bias in sulfate simulations (Fig. 6) between the three participating models using  
57 online oxidants and the other two models using offline oxidants (Table 2). See P8L469-550.

58

59 R1#5. The authors should make some comparison with other studies in a new section or talk about it in  
60 an existing section of the paper.

61 To date, there have been no sulfur budget reports focusing on the vast ocean. However,  
62 previous AeroCom studies have reported global sulfate atmospheric loading and its diversity  
63 across multiple AeroCom models using monthly and global mean column loadings. The newly  
64 added Table 5 summarizes these studies, including their reported global and annual sulfate  
65 multi-model mean (MMM) and diversity ( $\delta$ ).  $\delta$  is related to the standard deviation (std\_dev) and  
66 is defined as  $\delta = \text{std\_dev} / \text{MMM} * 100$  (%). The results of this work are lower than AeroCom-I  
67 but higher than AeroCom-II, which may be related to the different target years involved in these  
68 studies. One point to note is that the diversity of AeroCom-III models  $\delta$  has not reduced since  
69 AeroCom-I, which was studied nearly 20 years ago. The nearly 30% diversity combined with a  
70 greater proportion of sulfate than other anthropogenic aerosols make accurate sulfate modeling  
71 very important. Furthermore, these previous AeroCom studies were almost purely model  
72 studies, with only Gliš et al., 2021 introducing AOD-related light fields from ground stations and  
73 satellite retrievals. We have added this discussion in Sect. 4 (P12L807-823).

74

75 R1#6. Furthermore, if we improve sulfur simulation, what advantages can we expect? It would be  
76 helpful if the authors could briefly discuss the implications of the new findings in the conclusion section.  
77 Improved sulfur models are needed, given that the sulfur cycle plays a critical role in  
78 atmospheric quality, climate, and ecosystems, and that its bias in current aerosol climate  
79 models is one of the largest uncertainties in air quality and RF research (see response to R1#1).  
80 Through a comprehensive multi-model and multi-instrument comparison of remote ocean  
81 sulfur species in this work, shortcomings in model sulfur simulations are pointed out and  
82 potential directions for improvement are suggested (see response to R1#4). We have added a  
83 brief discussion of the implications of the new findings in the Conclusion section (P15L946-956),  
84 summarizing our response to R1#1#4#5.

85

## 86 **2. Information Overload and Simplification:**

87 R1#7. Some parts of the paper contain overwhelming information that may be simplified or moved to  
88 supplements. For instance, Section 3.1 allocates 28 lines (OL212-L239) to discuss three different  
89 sampling intervals, which may not be key information the readers need to know. This information  
90 (corresponding to OFig 2 (a)(d)(g)(i)) only builds up one-third content in OFigure 2, which makes the  
91 main point of OFigure 2 very hard to catch.

92 The discussion of the three-time resolution AMS data (OL212-239) and their visualization in Fig.  
93 2 have been moved to Supplementary Information. We have now made Fig. 2 in a manner  
94 consistent with Figs. 3-4.

95

96 R1#8. Another example starts from OL317 where the authors spent time explaining how the flag '-888' is  
97 replaced by '0' to represent the low values, which, although crucial for validating results, may not be  
98 necessary for most readers.

99 OL317-329 have also been moved to Supplementary Information.

100

101 R1#9. Additionally, the division of 5 models into 3 groups from OL340-L354 seems superfluous and is  
102 never referenced throughout the paper. I would recommend a description without grouping the models.  
103 These sentences are changed to "Specifically, CAM-ATRAS and GEOS have good SO<sub>4</sub> vertical gradients  
104 over the tropical and NH oceans, but their SO<sub>4</sub> values are too low compared to measurements over the  
105 Southern Hemisphere (SH) free troposphere. The SO<sub>4</sub> of IMPACT and OsloCTM3 decreases too slowly  
106 with altitude, as shown by their overestimated SO<sub>4</sub> values at high altitudes globally. E3SM performed  
107 SO<sub>4</sub> simulations among other models. However, the performance of these models' SO<sub>4</sub> vertical profiles  
108 cannot simply be explained by the way the oxidant is applied, because among the five models, CAM-  
109 ATRAS, IMPACT, and OsloCTM3 used interactive oxidant calculations, while E3SM and GEOS used  
110 archived oxidant data (Table 2). The complexity of the chemistry deserves more attention. Of the five  
111 models, OsloCTM3 and GEOS participated in the multi-model OH assessment (Nicely et al., 2000) and  
112 OsloCTM3 had a shorter methane lifetime (relative to OH) than GEOS." See P8L469-550.

113

## 114 **3. Layout and Readability of Figures:**

115 R1#10. Due to the huge load of information that is shown, optimizing the layout of figures is crucial to  
116 enhance readability. For example, I would recommend relocating the legends in OFigures 5-8 and  
117 putting this information on the top/bottom or right side of the charts.

118 The legends in Figs. 6-9 (OFigs. 5-8) are now at the top of the charts.

119

120 R1#11. Since you 'use 10-s merged data where observations above DL throughout the main text unless  
121 otherwise stated' (OL241), could you just show the results of 10-s data only on OFigure 2 and move the  
122 other to the supplement?

123 [Done. Please also see response to R1#7.](#)

124  
125 R1#12. Additionally, as Atom-1/2/3/4 are not following the order of the four seasons, I recommend  
126 adding notes on the seasons at a proper place in OFigures 9,10,11, and 13 to guide the readers when  
127 reading through the section about seasonal changes in the paper.

128 [Done.](#)

129

#### 130 **4. Conclusion:**

131 R1#13. The conclusion section is mostly a summary of the content. As mentioned earlier, the implication  
132 of the new findings can be stated in this section.

133 [We have added this paragraph in the Conclusion section \(P15L946-956\):](#)

134 [“Even after two decades of development, the diversity of sulfate simulations from AeroCom-I to  
135 AeroCom-III has not decreased. However, accurate sulfate simulation in current climate models is crucial  
136 to reduce radiative forcing biases. Several potential directions for improving sulfur simulations are  
137 suggested above. More importantly, apart from the shortcomings of individual models, all modelers  
138 should focus on the calculation of the air-sea exchange flux formula, as it plays a key role in determining  
139 DMS emissions. Modelers also need to study DMS and SO<sub>2</sub> vertical transport as well as SO<sub>4</sub> wet  
140 deposition during long-distance transport, as model biases are greatest at high altitudes. One suggestion  
141 to modelers is that the use of online oxidant fields is insufficient to explain the model sulfate bias, as  
142 there was no systematic bias in the sulfate simulations between the models using interactive oxidants  
143 and the models using archival oxidants in this study. The complexity of chemistry deserves more  
144 attention.”](#)

145

146 [Please also see response to R1#4.](#)

147

#### 148 **Technical comments:**

- 149 1. Please standardize the color and font of the indices of panels in OFigure 2.  
150 [Indices of panels in Fig. 2 have been removed based on the suggestion of reviewer 3 \(R3P7L305\).](#)
- 151 2. Please refine OFigure 12 to maintain the consistent style of other figures.  
152 [Done.](#)
- 153 3. In the caption of OFigure 9, AMS should be orange instead of 'red'.  
154 [Done.](#)
- 155 4. Please replace the vertical bar in OFigure 13 with a straight line as the shape and color is  
156 misleading.  
157 [Done.](#)
- 158 5. In OL467, please add a period after '4'.  
159 [Done.](#)

160

#### 161 **Reviewer 2 (R2):**

162 R2#1. In section 2.2, the authors say that they perform source attribution using sensitivity analysis  
163 method. By sensitivity analysis I would assume a perturbation approach where two simulations are  
164 performed: one with the baseline emissions and another where emissions from a given source are  
165 changed. The difference between the simulated variables in the two simulations would communicate

166 the sensitivity of the simulated concentrations to changes in precursor emissions from a particular  
167 source.

168 Yes, we need two simulated fields, one linked to baseline emission and the other linked to a given  
169 source, to diagnose source attribution. We have two methods to calculate the two fields in model  
170 simulation.

- 171 1. Run model twice for field (F). The first run F is linked to the baseline emission (F(base-emi)) and  
172 the second run F is linked to a given source (F(tag-emi)).
- 173 2. Run model once for fields F and Ftag (a newly added tracer) simultaneously. F is linked to the  
174 baseline emission and Ftag is linked to a given source.

175 The advantage of using the second method is obvious, simply for computational efficiency, especially  
176 when multiple tagged tracers are required. See newly added Sect. 2.3 “Tag-tracer study in GEOS”.

177  
178 R2#2. However, section 5 mentions tagging method being used for source attribution within GEOS-Chem  
179 model. Tagging involves changing the chemical mechanism within the model to write out the  
180 concentration variables along with the label of the source which they originate from.

181 Each specific aerosol component in GEOS GOCART is simulated independently from the others, and the  
182 contribution of each emission type to the total aerosol mass is also not interfered by that of other  
183 emission types. Thus, additional aerosol tracers can easily be “tagged” according to emission source  
184 types. The GEOS GOCART module includes a tagged aerosol mechanism that allows GOCART to calculate  
185 and transfer multiple sets of aerosol fields (e.g., A, Atag, etc) in a single job submission. See newly added  
186 Sect. 2.3 “Tag-tracer study in GEOS”.

187  
188 R2#3. I would also like to point to Line 45 (abstract) where the authors write: “sensitivity studies by  
189 applying tagged tracers”. I recommend the authors to reframe this sentence by clarifying the exact  
190 source attribution approach and model (GEOS-Chem), to avoid possible confusion among readers.  
191 Changed the sentence to “We identify their origins from anthropogenic versus natural sources with  
192 sensitivity studies by applying tagged tracers in GEOS model linking to emission types of anthropogenic,  
193 biomass burning, volcanic, and oceanic emissions.” See P1L44-47.

194  
195 R2#4. Since you discuss the results from GEOS-Chem tagged simulation, please specify the tagging  
196 method in section 2.2. Cite the relevant documentation of GEOS-Chem version and other previous  
197 papers where this tagging method has been used previously if any, for attributing sulfur species to its  
198 source origins.

199 The description of the tagging method has been added in Sect. 2.3.

200 Tracer-tag technical in GEOS has been widely used in aerosol and gas studies (Bian et al., 2021; Nielsen et  
201 al., 2017; Strode et al., 2018) and in supporting various aircraft field campaigns such as ARCTAS, KORUS-  
202 AQ, ATom, CAMP2Ex, ACCLIP, and more. Such techniques are also adopted in other models such as  
203 GEOS-Chem model (Fisher et al., 2017; Ikeda et al., 2017) and CESM (Butler et al., 2018).

204  
205 R2#5: Could you also say something about the contribution from shipping in the Pacific and Atlantic?  
206 Have you considered ship-based emissions also as anthropogenic emissions in your models? Would ship  
207 emissions which are also anthropogenic emissions be misread as anthropogenic emissions that are  
208 generally thought of as land-based emissions? Please make the necessary adjustments in their  
209 manuscripts at the locations wherever applicable (mostly sections 2.2 and section 5) and specify those  
210 changes in response to this comment.

211 Shipping emissions are concentrated between the tropics and mid-latitudes of the Northern Hemisphere  
212 over the Pacific and Atlantic Oceans. In our SO<sub>4</sub> source analysis (Sect. 5), we discussed the contribution  
213 of various emission types (anthropogenic, biomass burning, volcanic, and marine) to atmospheric SO<sub>4</sub>

214 over remote oceans. Here shipping emission was considered as anthropogenic emissions. We did not  
215 further differentiate the location of anthropogenic emissions in this study. We specifically pointed this  
216 out in Sect. 2.2 (P5L231-233) and modified accordingly the Abstract P1L44-46, Introduction P3L130-132,  
217 main text P13L852-853, and Conclusion P15L929-930.

218  
219 R2#6. Since you have used this tagged approach, I would also recommend that you specify the list of tags  
220 that you use. This could be either as a list in the text in section 2.2.

221 Four tags we used in GEOS for this study relate to emission types of anthropogenic, biomass burning,  
222 volcanic, and oceanic emissions. This list is now given in Abstract P1L46-47 and Sect. 2.3.

223  
224 R2#7: You could also add some future recommendations related to the scope of tagged simulations.  
225 With this approach we could also understand the contribution characteristics of emissions from various  
226 regions: both oceanic regions (Pacific, Atlantic, Sulfur Emission Control Areas etc.) and continental  
227 regions' (Asia, North America, South America, etc) sulfur emissions. These recommendations could be  
228 added either in section 5, where the tagged model's results are being discussed or in the concluding  
229 section (section 6).

230 Tags can be linked to various emission types (anthropogenic, biomass burning, etc.) and/or various  
231 emission regions (Pacific, Atlantic, Asia, North America, etc.), given that the contribution of each  
232 emission type/region to the total aerosol mass is also not interfered by that of other emission  
233 types/regions. The tagged simulation is a powerful tool that is widely used not only in aerosol  
234 components (Bian et al., 2021; Ikeda et al., 2017), but also in tracer gases such as CO (Fisher et al., 2017;  
235 Strode et al., 2018; Nielsen et al., 2017), CO<sub>2</sub> (Lin et al., 2020), and O<sub>3</sub> (Butler et al., 2018). This  
236 technique is particularly useful when supporting aircraft field campaigns (ARCTAS, KORUS-AQ, ATom,  
237 CAMP2Ex, ACCLIP, and etc) for flight planning due to its computational efficiency and its characteristic of  
238 tracking the origin of plumes linking to emission type and location. We have added this discussion in  
239 Sect. 2.3.

240

### 241 **Reviewer 3 (R3)**

242 R3#1. The authors lack to highlight what is new in this study compared to previous literature. This is  
243 evident in the Introduction, where there is no mention of results from previous/recent studies using the  
244 ATom measurements nor using the AeroCom models. This is a major concern because the manuscript, as  
245 it is, looks like a comparison exercise with no follow-up message.

246 Thanks for this comment. In the introduction, we have added a paragraph (P3L134-141) summarizing  
247 relevant previous/recent studies using the ATom measurements and the AeroCom models.

248

249 R3#2. Lack of "what's new". The manuscript does not convey the message of what is new compared to  
250 previous literature. The Introduction needs to contain references to previous literature using the ATom  
251 measurements and the AeroCom models for studies of sulfur-containing species over land and ocean. I  
252 think that one paragraph for ATom and one for AeroCom would suffice. The Abstract and the Conclusions  
253 must also state what is new in the study.

254 Yes. We have added a paragraph reviewing the literature and noting "what's new" in P3L134-145 (see  
255 also reply to R3#1).

256

257 Our abstract now includes this sentence (P1L47-49): "Our work presents the first assessment of  
258 AeroCom sulfur study using ATom measurements, providing directions for improving sulfate simulations,  
259 which remain the largest uncertainty in radiative forcing estimates in aerosol climate models."

260

261 The Conclusions now include this paragraph (P15L946-956): “Even after two decades of development,  
262 the diversity of sulfate simulations from AeroCom-I to AeroCom-III has not decreased. However, accurate  
263 sulfate simulation in current climate models is crucial to reduce radiative forcing biases. Several potential  
264 directions for improving sulfur simulations are suggested above. More importantly, apart from the  
265 shortcomings of individual models, all modelers should focus on the calculation of the air-sea exchange  
266 flux formula, as it plays a key role in determining DMS emissions. Modelers also need to study DMS and  
267 SO<sub>2</sub> vertical transport as well as SO<sub>4</sub> wet deposition during long-distance transport, as model biases are  
268 greatest at high altitudes. One suggestion to modelers is that the use of online oxidant fields is  
269 insufficient to explain the model sulfate bias, as there was no systematic bias in the sulfate simulations  
270 between the models using interactive oxidants and the models using archival oxidants in this study. The  
271 complexity of chemistry deserves more attention.”

272  
273 This study can be relevant if, for instance, it is the first using the ATom airborne measurements. If this  
274 was the case, it must be emphasized considerably more in the Abstract, the Introduction (like OP1L93-97  
275 but much better/stronger) and the Conclusions (and throughout the text).

276 No, ATom measurements have been used in various studies. The ATom aerosol studies include NPF in the  
277 tropics (Williamson et al., 2019), fine aerosol lifetimes (Gao et al., 2022), and various aerosol  
278 components such as sea salt (Bian et al., 2019), OA (Hodzic et al., 2020), smoke (Schill et al., 2020),  
279 mineral dust (Froyd et al., 2022), and DMS chemistry (Fung et al., 2022). See P3L134-140.

280  
281 This study can be relevant also if a comparison between AeroCom models and ATom measurements has  
282 not been done before. In this case also, the authors should emphasize the originality of such  
283 intercomparison.

284 Our work is the first study to use ATom measurements for comparison with the AeroCom models,  
285 focusing on all sulfur species simulated in current aerosol climate models. This work extends a previous  
286 effort that utilizes ATom measurements for comparison with AeroCom models for organic aerosol  
287 (Hodzic et al., 2020). See new paragraph in P3L134-145.

288  
289 R3#3. Conclusions. Based on the major comment above, the Conclusions need to be strengthened. Once  
290 the novelty of the study will be identified (again, first intercomparison?), the Conclusions must be  
291 modified accordingly. Here follow the two main conclusion points that need to be addressed:

292  
293 1) It seems to me that the authors conclude that the dominant source of atmospheric sulfur (SO<sub>2</sub>  
294 in particular) over oceans is anthropogenic. It is well known that the largest contributions to the  
295 sulfur budget (SO<sub>2</sub> included) is due to human activities. Hence, despite the short lifetime of the  
296 sulfur compounds, it does not seem so striking that the major source of atmospheric sulfur is  
297 anthropogenic even over oceans (e.g., Chin et al., 2000). Thus, I have the impression that this  
298 conclusion does not add anything significantly new to the current knowledge. In order to make  
299 this conclusion more appealing, I suggest increasing its relevance by emphasizing its unicity. I  
300 couldn't find any other modeling study asserting that the sulfur over the oceans is mostly  
301 caused by human activities. This means that the authors are the first proposing that conclusion  
302 (as far as my literature research goes), and that is certainly worth mentioning. However, I  
303 suggest to carefully check the literature for modeling studies looking at the atmospheric sulfur  
304 over the oceans. If the authors find a relevant study, it would be interesting to compare their  
305 findings with yours.

306 The authors also could not find other modeling study asserting that the sulfur over the oceans is  
307 mostly caused by human activities. We changed the conclusion sentence of “On the other hand,

308 our study shows that anthropogenic emissions remain a major source of sulfate aerosols  
309 generated over remote oceans ..." to "On the other hand, our study is the first asserting that  
310 anthropogenic emissions remain a major source of sulfate aerosols generated over remote  
311 oceans ..." (P15L941-944).

312  
313 2) Another conclusion consists in the description of the significant differences between the  
314 observations and the models. This is somehow discussed in the text with the attribution of the  
315 differences to emissions (DMS, e.g., OP9L379-394), chemical conversion (SO<sub>2</sub> to SO<sub>4</sub>, e.g.,  
316 OP10L449-451) and transport (SO<sub>2</sub>, e.g., OP8L365-367) depending on the model, with a nice  
317 final discussion (OP13L584588). However, these parts (especially OP13L584588) can be explored  
318 further with a more detailed discussion of the models. Here's a few ideas for further discussion:  
319 1) what are the common aspects among the models? and their differences? Can we discern  
320 something from similarities/differences 2) It is possible/feasible to perform additional sensitivity  
321 tests to assess model performances (not for this manuscript but as material for discussion)? 3)  
322 What would be the added value of satellite data in this comparison (again, for future studies):  
323 would we learn something more thanks to the denser temporal and spatial sampling compared  
324 to airborne measurements)?

325 Thanks for these excellent suggestions.

326 Regarding recommendation 1: We examined the DMS emission derivation methods used in five  
327 AeroCom models (see the newly added Table 3 and the corresponding discussion in P9L573-581) and  
328 found that the parameterization of air-sea exchanges in DMS flux calculations is very important P9L589-  
329 648). We also recognized that using interactive oxidant calculation is insufficient to account for the  
330 model sulfate bias (see P8L473-550).

331  
332 Regarding recommendation 2: Yes. Several sensitivity tests have been suggested in Conclusion P14L910-  
333 915.

334  
335 Regarding recommendation 3: In-situ aircraft measurements provide intensive and extensive fields that  
336 can be used to improve model simulations. However, aircraft measurements are limited by space and  
337 time. On the other hand, satellite data coupled with global long-term measurements can provide an  
338 independent assessment of model improvements. In this way, we can use the model as a bridge  
339 between aircraft and satellite measurements. Denser temporal and spatial sampling of aircraft  
340 measurements can provide tracer vertical profiles, which are critical for modeling tracer global  
341 distribution and assisting satellite AOD/AI retrievals.

342  
343 Additionally, aircraft measurements can provide detailed component measurements that cannot  
344 currently be retrieved from satellite measurements. More intensive temporal aircraft measurements can  
345 also provide tracer diurnal cycles, which are important for air quality studies.

346  
347 3) Within the Conclusions, the authors can also dare to provide some outlook for future model  
348 developments by suggesting ways to improve the current models (e.g., update the chemical scheme,  
349 increase horizontal/vertical resolution, identify and try to improve relevant parametrization for  
350 transport).  
351 Several potential directions for improving sulfur simulations were suggested in Conclusion P14L910-915.  
352 We also added the following sentences (P15L949-956) to the Conclusion. "More importantly, apart from  
353 the shortcomings of individual models, all modelers should focus on the calculation of the air-sea  
354 exchange flux formula, as it plays a key role in determining DMS emissions. Modelers also need to study



355 DMS and SO<sub>2</sub> vertical transport as well as SO<sub>4</sub> wet deposition during long-distance transport, as model  
356 biases are greatest at high altitudes. One suggestion to modelers is that the use of online oxidant fields is  
357 insufficient to explain the model sulfate bias, as there was no systematic bias in the sulfate simulations  
358 between the models using interactive oxidants and the models using archival oxidants in this study. The  
359 complexity of chemistry deserves more attention.”

360  
361 R3#4. Tracer-tag. It would be very helpful if the authors added more detail to the methodology of the  
362 tracer-tagging concept used to obtain the source origins shown in OFig. 13. My understanding is that  
363 these sensitivity tests were conducted by the GEOS developers and made available to the authors. Even  
364 though the authors did not perform the experiments, the concept of tagged data needs to be explicitly  
365 discussed (currently it is superficially mentioned in Section 2.2) so the non-expert reader can understand  
366 the logic behind such sensitivity test.

367 [The tracer-tag concept is now described in Sect 2.3 “Tag-tracer study in GEOS”. Please also see response](#)  
368 [to R2#1 - #4 and R2#6 - #7.](#)

369  
370 R3#5.  
371 Figures. The figures are generally too busy – there is a lot of information that is not always entirely  
372 discussed. For example, the AMS measurements at 1s and 60s in OFig. 2 are barely discussed. In that  
373 regard, the authors state that they use 10s merged data for AMS in the text unless otherwise stated  
374 (OP6L241-242). Based on that, I suggest removing the 60s and 1s lines from OFigure 2 (maybe moving  
375 the 1s, 10s, 60s discussion to a separate paragraph in the methods?). This way, the authors could merge  
376 the observations and models together in the same panels (like OFig. 3) and make OFig. 2 easier to read.

377 [The information of 60-s and 1-s in OFig. 2 and corresponding discussion has been moved to the](#)  
378 [Supplementary Information.](#)

379  
380 Because of the complexity of the figures, the discussion is often confusing in the sense that the authors  
381 do not specify any panel when presenting the results. For example, the analysis of Fig. 2 (OP5L212-  
382 P6L264) never mentions one panel specifically. This makes it difficult to discern which flight (ATOM1-  
383 ATOM4) is considered.

384 [Since the discussion follows the number of ATom deployments given in the panels, we removed the](#)  
385 [panel indices from Fig. 2.](#)

386  
387 In addition, the box-and-whisker panels are seldom mentioned, and they can be probably removed from  
388 there (and maybe merged and moved to Section 2 or moved to the supplement?). As a general rule, if a  
389 panel/figure is not discussed, it should not be shown.

390 [Discussion L350-355 is based on the information shown in the box-and-whisker panels.](#)

391  
392 For OFigure 3, the statistics are briefly mentioned in OP6L280-282. Please provide more discussion of  
393 the statistics shown in OFig. 3 or consider moving the figures/panels to the supplement, given the large  
394 number of figures in the manuscript.

395 [The discussion has been modified as “Statistics indicate lower model SO<sub>2</sub> medians than observed \(box-](#)  
396 [and-whisker in Fig. 3\), especially during ATom-1. However, the model means are comparable or even](#)  
397 [higher than those observed, indicating that the models simulate unobserved episode events.](#)

398 [Consequently, the simulated mean/median ratio is higher than the observed value. Across the four](#)  
399 [ATom deployments, ATom-4 has much better model observation consistency.” See P7L385-389.](#)

400

401 OFigure 4 also contains a large number of panels – (and the box-and-whisker panels are again shortly  
402 mentioned). As my comment above, please provide more discussion or move the panels that are not  
403 discussed in the Supplement. Furthermore, the addition of panels c,f,i,l breaks the continuity with  
404 respect to the previous figures, which contain only PDFs and statistics. These panels should belong to a  
405 separate figure (and paragraph) that discusses the vertical information from the observations/model  
406 comparison (maybe merged/moved to Section 3.2?).

407 [The discussion of P8L435-441 is based on the statistics shown by box-and-whisker panels. We pointed  
408 out this in the revised version.](#)

409

410 [The OFig. 4 has been separated into two figures: one contains PDFs and statistics \(Fig. 4\) and the other  
411 contains original panels c,f,i,l \(Fig. 5\).](#)

412

413 A final note on the box-and-whisker panels: if the authors think that the statistics should be shown,  
414 maybe it can be shown as tables depending on the sulfur species instead of panels in the figures.

415 [To avoid the graph being too busy, we removed the values of median and mean from the graph.](#)

416 [However, we do think that summarizing the various statistics in charts can help readers navigate the  
417 data more easily.](#)

418

419 For OFigures 9-11, I would suggest to average together the horizontal regions that do not differ much  
420 one from another (e.g., Fig. 9a, A40S-20S with A70S-40S) and adapt the discussion accordingly.

421 [The sulfur species can differ much between A40S-20S and A70S-40S depending on the season. For](#)

422 [example, the Atlantic free tropospheric SO<sub>2</sub> over the A40S-20S in ATom-4 is much higher than over the](#)

423 [A70S-40S \(Fig. 10d\). Such performance is also visible in SO<sub>4</sub> \(Fig. 9d\) but to a much smaller extent.](#)

424 [However, this behavior is not shown across the entire vertical column of DMS \(Fig. 11d\), indicating that](#)  
425 [a marine source is not the cause. Considering that A40S-20S is located in the downwind area of South](#)  
426 [America \(SA\), SA pollution showed an impact on SO<sub>2</sub> in the marine atmosphere of A40S-20S. See](#)  
427 [discussion in P11L719-723.](#)

428

### 429 **R3 Minor Comments.**

430 • OP1L1: “[...] and ecosystems.”. Could you add one or two sentences on how the sulfur cycle plays  
431 the key role (e.g., pollution, acid rain)?

432 [Is this typo for P1L34? Changed the sentence to “The sulfur cycle plays a key role in atmospheric air  
433 quality, climate, and ecosystems, such as pollution, radiative forcing, new particle formation, and  
434 acid rain.”](#)

435 • OP2L62-63: “wreak havoc”. Could you replace this expression with something like “devastate,  
436 destroy”?

437 [Done.](#)

438 • OP2L83-84: “the TUT and above are observation-sparse regions”. I would rephrase this part as  
439 something like “...observations in the TUT region and above are sparse”.

440 [Done.](#)

441 • OP2L91: Is it possible to specify what “DC-8” means?

442 [DC-8 means Douglas DC-8 jetliner. See change in P3L116.](#)

443 • OP3L123: “(i.e., ~0.2-12 km) (Thompson et al., 2021)” --> (i.e., 0.2-12 km, Thompson et al., 2021).

444 [Done.](#)

445 • OP4L148-150: I recommend rephrasing this sentence to something like “Two instrument were used  
446 [...]: the California [...] and the NOAA [...] (Table 1)”.

447 Done.

448 • OP4L177: “(CMIP6) (Feng et al., 2020)” →(CMIP6, Feng et al., 2020).

449 Changed the sentence to “The suggested emissions are the Coupled Model Intercomparison Project

450 Phase 6 Community Emissions Data System (CEDS, Hoesly et al., 2018) ....”. See P5L224-227.

451 • OP4L178: “(.... System (GFAS))” →(... System, GFAS).

452 Done.

453 • Section 3.1: I suggest homogenizing the discussion here. As it is, OFig. 3 is less discussed than OFig. 2

454 and OFig. 4. The authors could enhance the discussion for OFig. 3 with the addition of a couple of

455 paragraphs on SO2 or reduce the discussions of the OFigs. 2 and 4.

456 The discussion of Figs. 2 and 4 has been reduced in Sect. 3.1.

457 • OP6L252-264: The Atom flights are not discussed separately for OFig. 2 (SO4). I suggest providing

458 some discussion about the different flights to maintain consistency with the following discussions of

459 OFigs. 3 and 4 (where the different flights are mentioned).

460 We added discussion of different flights in P7L363-366. We also reframed the paragraph by

461 discussing two measures first. This style is consistent with the style used in SO2 and DMS (i.e., Figs.

462 3-4) discussions.

463

464 • OP7L305: “OFig. 4c,f,i,l”. This is the only place of Section 3.1 where specific panels are mentioned.

465 Since no other panel of OFigs.2, 3 or 4 is explicitly discussed, I suggest 1) either discussing explicitly

466 the remaining panels or 2) removing the explicit mention to OFig. 4c,f,i,l and move these panels into

467 another figure (as suggested in my major comment about OFigures above).

468 Following the reviewer’ suggestion, we have removed the indices of the panels in Figs. 2-4 and

469 discussed the figures following ATom-# given in the figures. We also extracted OFig. 4c,f,i,l and put

470 them in Fig. 5 to maintain continuity among Figs. 2-4.

471 • OP7L309: I suggest removing “Apparently”.

472 Done.

473 • OP7L317: I suggest rephrasing “...is uniquely having a....” to “..... is unique because it has a .....”

474 Done.

475 • OP8L344-345: I suggest rephrasing “Despite that improvements are needed, ...” to “Despite the

476 need for improvements, the models are generally able to capture the shape of the SO4 profile.”

477 Done.

478 • OP8L346-354: I find the introduction of the model Groups 1, 2 and 3 a little confusing (also, these

479 groups are not mentioned again throughout the manuscript). I suggest keeping the model names as

480 there are only 2 models per group and Group 2 consists only in E3SM.

481 Removed the group categories, see P8L469-473. Also see R1#9 and R3#3.

482 • OP8L358: I suggest rephrasing “.... an order of magnitude, but around ....” to “.... an order of

483 magnitude around ....”.

484 Done.

485 • OP8L359: The authors say that SO2 is better in IMPACT in the NH and CAM-ATRAS and OsloCTM3 in

486 the SH, but compared to what? Please specify the reference (I suppose that would be GEOS and

487 E3SM?).

488 Compared to other AeroCom models not mentioned in the sentence, see P9L553-555.

489 • OP8L360-361: Please be more specific with regard to how the models should improve the SO2

490 simulations (too large/little concentrations wrt observations?). I understand that the differences are

491 thoroughly discussed in the following sentences, but it would be nice to have a preliminary “hint”.

492 Yes. The sentence is changed to “The tropical Pacific appears to be an interesting region, with all  
493 models except GEOS failing to capture observed local SO<sub>2</sub> sources.” See P9L556-557.

494 • OP8L369-370. “All models [...] ATom-1 observation”. I do not quite understand what the authors  
495 mean with this sentence. Could you please explain it?

496 The sentence is changed to “All other models show lower SO<sub>2</sub> at the surface than in the lower free  
497 troposphere, which is inconsistent with the observed profiles.” See PL9565-566.

498 • OP8L371-375. Since this part refers to a figure in the supplement (OFig. S5), I suggest reducing this  
499 discussion here.

500 The following sentence (OP8L372-375) was moved to the Supplementary Information: “Modeled  
501 SO<sub>2</sub> volume mixing ratios are generally lower compared to the CIMS observations for most altitudes  
502 and latitudinal bins in ATom-1 to -3, which may be partially owing to the CIMS measurement issue  
503 discussed in Sect. 3.1.”.

504 • OP9L384: “The parameterization...”. Do the authors refer to the parameterization of Nightingale et  
505 al., (2000)? If yes, I suggest rewriting the beginning of the sentence with something like “That/This  
506 parameterization ....”.

507 The paragraph has been rewritten to response R3#3, so this comment is no long relevant in the  
508 revised version.

509 • OP9L396: “... than the observed one,” I suggest providing an example of a panel showing this  
510 steeper gradient (e.g., OFig. 7 54N-90N Atlantic). It would be nice to add panel numbers/letter to  
511 these vertical profiles to facilitate the navigation during the discussion.

512 We added “(e.g., Fig. 8 A54N-90N)” to P10L650-651. However, if we add panel numbers to these  
513 vertical profiles, we will end up mentioning only one number in the text, which goes against the  
514 reviewer's suggestion (see P7L305 above).

515 • OP9L399: I suggest rephrasing “tease out” with “obtain”.

516 Done.

517 • OP9L396-410: Very nice discussion!

518 Thanks.

519 • OP9L414: I suggest rephrasing “These behaviors are inconsistent with....” with “These patterns do  
520 not agree with....”.

521 Done.

522 • Section 3.3: Concerning the definition of the altitude ranges, I suggest keeping the same  
523 nomenclature both in the text and in the figures. Specifically, in the text the authors use words like  
524 “free troposphere” or “boundary layer (BL)”, while in the figures they show only altitude ranges in  
525 kilometers (0-1.5, 1.5-6, .... km). My suggestion is to add the name of the layer to the range in  
526 kilometer in the Figures (e.g., “0-1.5 km” becomes “0-1.5 km (BL)”, etc.).

527 Done.

528 • OP10L422: I suggest explaining what the Figures contain. Something like “In order to analyze [...],  
529 Figs 9-11 shows histograms of XX concentrations as a function of altitude (rows) and latitudinal band  
530 (columns)”.

531 The sentence has been changed to “In order to analyze model performance on a regional and  
532 seasonal basis, Figs. 10-12 show histograms of SO<sub>4</sub>, SO<sub>2</sub>, and DMS concentrations as a function of  
533 altitude (rows) and latitudinal band (columns).” See P10L676-678.

534 • OP10L432-433: “The most high [...] (NH spring).” Could the authors specify the altitude range here?  
535 The altitude range for free-troposphere refers to 1.5 – 12 km, see change in P10L684-685.

- 536 • OP10L438: I suggest rephrasing “more polluted” with “tends to simulate higher SO<sub>4</sub>  
537 concentrations”.
- 538 Done.
- 539 • OP10L438-440: “SO<sub>4</sub> concentrations [...] the Supplement.” I suggest expanding this part by moving  
540 here the relevant parts of the Supplement.
- 541 The relevant discussion of the Supplement (see below) has been moved to the main text.
- 542 P11L711-715: “For example, in summer and winter, the CAM-ATRAS model gave the highest  
543 estimates of atmospheric SO<sub>4</sub> in the oceanic BL, but the IMPACT and OsloCTM3 models gave the  
544 highest estimates of atmospheric SO<sub>4</sub> in the free troposphere (Fig. S9). All models except the GEOS  
545 model generally overestimate SO<sub>4</sub> in the atmosphere.”
- 546 P11L727-732: “For example, the E3SM model gives significantly higher SO<sub>2</sub> compared with the  
547 measurements and other models in BL (Fig. S10). Unlike the case of SO<sub>4</sub>, all models tend to  
548 underestimate SO<sub>2</sub> in the free troposphere, with some exceptions such as the GEOS model in the  
549 North Pacific mid-high-latitude winter (ATom-2) and the CAM-ATRAS and IMPACT models in the  
550 South Atlantic mid-latitude autumn (ATom-4).”
- 551 P11L745-747: “The overestimation of the DMS multi-model median in Fig. 12 is clearly attributable  
552 to the contribution of all models shown in Fig. S11, with the models CAM-ATRAS and OsloCTM3  
553 being more prominent.”
- 554 • OP10L429-440: There is no mention of the difference between Pacific and Atlantic regions. I suggest  
555 adding a couple of sentences discussing this separation.
- 556 We added following sentences in P10L692-709: “Compared to observations, model tends to  
557 simulate higher SO<sub>4</sub> concentrations in the free tropospheric atmosphere. Both observations and  
558 simulations show that the SO<sub>4</sub> in the Pacific is higher than that in the Atlantic during the NH high-  
559 latitude autumn (ATom-3) and the NH mid-latitude spring (ATom-4). The differences between  
560 observations and simulations are generally larger in the Atlantic than in the Pacific, particularly in  
561 the SH.”
- 562 • OP10L443-444: “..... and pollution affects ....” It is not clear to me what the authors mean with  
563 pollution. Could the authors explain?
- 564 Changed “pollution affects” to “this high SO<sub>2</sub> region extends to”. See P11L718-719.
- 565 • OP10L444: I suggest changing “Areas where free tropospheric SO<sub>2</sub> pollution is relatively polluted ....”  
566 to “Areas where free tropospheric SO<sub>2</sub> concentrations are relatively large .....”.
- 567 Done.
- 568 • OP10L442-451: there is no mention of ATom 2 in this paragraph. I suggest including one sentence  
569 discussing the most relevant pattern for ATom 2.
- 570 The discussion for ATom-2 has been added in P11L720-723. “For instance, free troposphere appears  
571 to be more polluted than other regions in the NH Pacific during ATom-2 and in the SH mid-latitude  
572 Atlantic during ATom-4, but not in the BL, implying a potential source of horizontal transport.”
- 573 • OP10L454: I suggest rephrasing “.... when the hemisphere is in spring” with “.... during springtime”.  
574 Done.
- 575 • OP10L458-459: This sentence concerning the BL sounds a bit redundant with part of the sentence  
576 before (P10L457, discussing the free troposphere) except for the point (3). I suggest merging the  
577 discussions together to avoid repetition.
- 578 Removed this sentence (OP10L457-458) to avoid repetition: “... suggesting a potential slower  
579 vertical transport or faster DMS chemical loss in models.”

- 580 • OP10L460: I suggest rephrasing “The convoluted effort can be somehow alleviated by ....” with  
581 “Additional insights can be obtained by ....”.
- 582 [Done.](#)
- 583 • OP10L463: I suggest replacing “giving” with “because”.
- 584 [Done.](#)
- 585 • OP10L453-465: Also here, very nice discussion.
- 586 [Thanks.](#)
- 587 • OP11L468: I suggest adding a sentence or two explaining the need for this Section (why it is  
588 important to look at the sulfur budget in model in light of what was shown before and what will  
589 come in Section 5).
- 590 [We added following two sentences there: “Budget analysis is a simple and basic method that has  
591 been widely used to document the underlying performance of a model. This analysis allows us to  
592 evaluate the AeroCom-III sulfur simulations against previous AeroCom-I and -II studies and reserves  
593 a record for future model evaluations.” See P11L750-768.](#)
- 594 • OP11L489: I suggest rephrasing “... are pretty much the same as they should be” with “... are as  
595 expected”.
- 596 [Changed the sentence to “source and deposition are pretty much the same as expected”.](#)
- 597 • OP12L524: I suggest replacing “... is at its most active” with “is the largest”.
- 598 [Done.](#)
- 599 • OP12L525: I suggest removing “and event”.
- 600 [Done.](#)
- 601 • OP12L530: I suggest removing “where and”.
- 602 [Done.](#)
- 603 • OP12L536 “... continental areas” I just have a question: is there any anthropogenic source of sulfur  
604 over the oceans (ships?). If yes, it would be nice to mention it.
- 605 [Done. See P13L852-853.](#)
- 606 • OP12L554: “It has a clear...” What does “It” refer to? Tropospheric SO<sub>4</sub>? I suggest the authors to  
607 specify here.
- 608 [Changed “It has a clear ...” to “There is a clear ...”.](#)
- 609 • OP12L556: “There are two ...” This sentence needs to be introduced. Something like “Concerning  
610 volcanic sources, emissions from volcanoes are of two types.”
- 611 [Done.](#)
- 612 • OP12L556-P13L561: The two types of volcanic contributions need to be separated more clearly. I  
613 suggest something like “One type is the volcanic degassing [...]. The other type consists in the  
614 volcanic eruptions [...]”.
- 615 [Done. See P14L882-886.](#)
- 616 • OP13L560: I suggest removing “eruption”.
- 617 [Done.](#)
- 618 • OP13L571: I suggest adding “airborne” before “ATom”.
- 619 [Done.](#)
- 620 • OP13L571-573: This nice sentence is the goal and “what’s new” in the manuscript. I suggest  
621 expanding this in the Introduction with references to previous studies (and a similar sentence in the  
622 Abstract). See my major comments on this aspect.

623 Yes. We have added a paragraph reviewing previous relevant research in the Introduction section  
624 (P3L134-145). We have also added Table 5 and corresponding discussion (P12L807-823) comparing  
625 the diversity of global sulfate atmospheric loads from multiple AeroCom models since Aerocom-I.  
626 See also responses to R1#5 and R3#2.

627 • OP13L590: “over remote oceans” Again, this is the goal and should be stated more clearly in the  
628 Introduction.

629 These key words have been mentioned already in Abstract (P1L40), the Introduction (P2L105-106,  
630 L121, L128-129), and model experiment design (P5L250).

631 • OP13L599: “... this proportion is increased ...” Do the authors know the amount of the increase?

632 This SO<sub>4</sub> increased by explosive eruptions varies in location and timing.

633 • OFigure 9: In the caption, I suggest adding the seasons corresponding to the different Atom flights.  
634 Done.

635 • OFigure 10: The contribution from biomass burning (BB) is hardly discussed in Section 5 (which is  
636 logical!). Therefore, I suggest renaming BB to something like OTHER and state that it includes  
637 biomass burning (and any other sulfur source) and that it will not be discussed in Section 5 because  
638 its contribution is negligible compared to AN, VOL and OCN.

639 Done. See P13L856-857.

640
